# Supplementary material for: Photogenerated charge separation and recombination path modification in monocline Lu2WO6via lattice transition and Bi–O antibonding states
Source: Royal Society of Chemistry journal article supplement (doi:10.1039/d1dt00700a), 2021-01-01
Supplement: d1dt00700a1.pdf [file d1dt00700a1.pdf]

Supporting information

**Photogenerated charges separation and recombination path modification in monocline Lu<sub>2</sub>WO<sub>6</sub> via lattice transition and Bi-O antibonding states**

Chunyu Zheng,<sup>a‡</sup> Ce Yu,<sup>b‡</sup> Han Yu,<sup>a‡</sup> Huibing Zheng,<sup>c</sup> Luqiao Yin,<sup>d</sup> Nian Fu,<sup>e</sup> Bangfu Ding,<sup>b\*</sup> Liang Mao,<sup>f\*</sup> Junying Zhang,<sup>g</sup>

<sup>a</sup>Key Laboratory of brain-like neuromorphic devices and systems of Hebei Province, College of Electron and Information Engineering, Hebei University, Baoding 071002, China; <sup>b</sup>College of Civil Engineering and Architecture, Hebei University, Baoding 071002, China;

<sup>c</sup>School of mathematics and physics, Anyang Institute of Technology, Anyang 455099, China

<sup>d</sup>Key Laboratory of Advanced Display and System Applications, Shanghai University, Ministry of Education, Shanghai 200444, China

<sup>e</sup>College of Physics Science and Technology, Hebei University, Baoding 071002, China;

<sup>f</sup>School of Materials Science and Engineering, China University of Mining and Technology, Xuzhou 221116, China

<sup>g</sup>School of Physics, Beihang University, Beijing 100191, China

Corresponding author. E-mail address: [dbf1982@126.com](mailto:dbf1982@126.com) and [dingbangfu@gmail.com](mailto:dingbangfu@gmail.com) (B. F. Ding), E-mail: [maoliang@cumt.edu.cn](mailto:maoliang@cumt.edu.cn) (L. Mao)

Table S1. Masses of raw materials in Bi-doped and Bi<sup>3+</sup>+RE<sup>3+</sup>-codoped samples

| Samples (g)                                                   | WO <sub>3</sub> | Lu <sub>2</sub> O <sub>3</sub> | Bi <sub>2</sub> O <sub>3</sub> | RE <sub>2</sub> O <sub>3</sub> |
|---------------------------------------------------------------|-----------------|--------------------------------|--------------------------------|--------------------------------|
| ω Bi                                                          | 0.3478          | (1-ω)×0.5969                   | ω×0.6989                       | 0.0                            |
| 1% Bi <sup>3+</sup> +x Sm <sup>3+</sup>                       | 0.3478          | (0.09-x)×0.5969                | 0.0070                         | x×0.5231                       |
| 1% Bi <sup>3+</sup> +y Eu <sup>3+</sup>                       | 0.3478          | (0.09-y)×0.5969                | 0.0070                         | y×0.5279                       |
| 1% Bi <sup>3+</sup> +z Dy <sup>3+</sup>                       | 0.3478          | (0.09-z)×0.5969                | 0.0070                         | z×0.5595                       |
| ω=0.005, 0.01, 0.03, 0.05, 0.10, 0.15, 0.20, 0.30, 0.40, 0.50 |                 |                                |                                |                                |
| x=0.01, 0.03, 0.05, 0.07, 0.10                                |                 |                                |                                |                                |
| y=0.01, 0.05, 0.10, 0.15, 0.20                                |                 |                                |                                |                                |
| z=0.005, 0.02, 0.04, 0.06, 0.08                               |                 |                                |                                |                                |

Table S2. All VCNEB parameters setting in INPUT file upon simulating monocline to perovskite phases transition

```

*****
*           TYPE OF RUN AND SYSTEM           *
*****
VCNEB      : calculationMethod

numSpecies
24  4  4  4
EndNumSpecies

atomType
O  Lu  W  Bi
EndAtomType

valences
2  3  6  3
endValences

0.00      : ExternalPressure
*****
*           VCNEB options           *
*****
111      : vcnebType
15       : numImages
143      : numSteps
1        : optimizerType

```

---

```

1          : optReadImages
3          : optRelaxType
0.1       : dt
0.005     : ConvThreshold

*****
*          NEB options      *
*****

0.3       : VarPathLength
3         : K_min
6         : K_max
0         : optFreezing
0         : optMethodCIDI
*****

*          OUTPUT          *
*****

2         : FormatType
10        : PrintStep
*****

*  DETAILS OF AB INITIO CALCULATIONS  *
*****

abinitioCode
1
ENDabinit

commandExecutable
yhrun -n 48 -p TH_NEW1 /vol6/home/user/bin/vasp >out
EndExecutable

1         : whichCluster
1         : numParallelCalcs

```

---

Table S3. Lobsterin file in COHP calculation for one, two, and three Bi<sup>3+</sup>-doped monoclinic Lu<sub>2</sub>WO<sub>6</sub>

---

| COHP Parameters | Values                                           |
|-----------------|--------------------------------------------------|
| COHPstartEnergy | -6                                               |
| COHPendEnergy   | 10                                               |
| basisSet        | pbeVaspFit2015                                   |
| basisfunctions  | O 2s 2p W 5p 5d 6s Lu 4f 5s 5p 5d 6s Bi 5d 6s 6p |
| cohpGenerator   | from p to q between atom I and atom II*          |

---

\*p and q denoting bond length

---

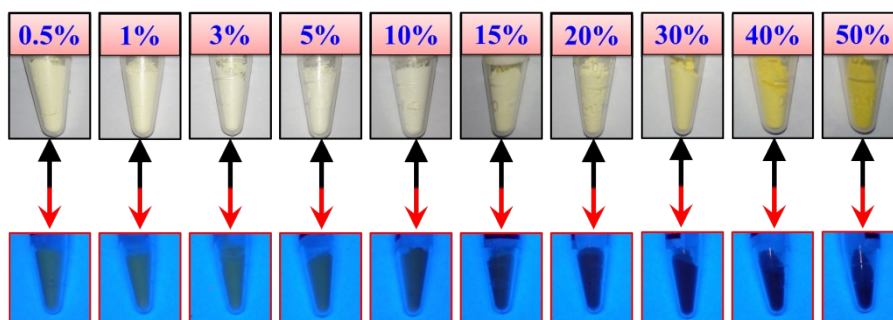

Figure S1 Photographs of samples under natural light (above) and 365 nm ultraviolet lamp (down)

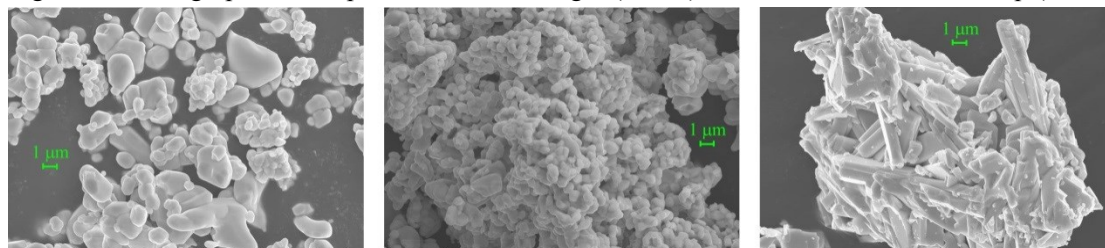

Figure S2. High resolution SEM images of 1at% (a), 15at% (b), and 50at% (c) Bi-doped samples

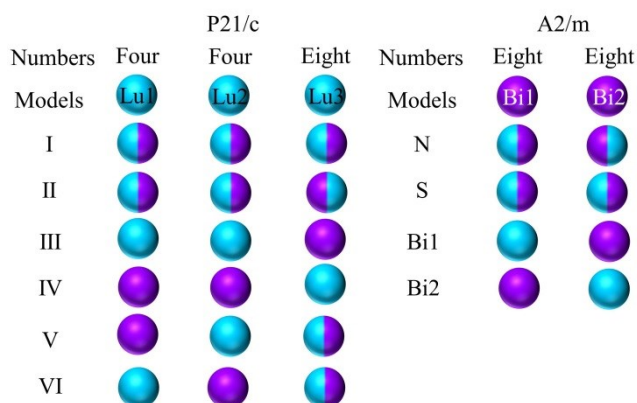

Note: single and double colors denoting full and semi occupation.  
 semi replacement different Lu<sub>3</sub> for models I and II  
 N and S representing neighbor and staggering occupation

Figure S3 Six P21/c and four A2/m 1×2×1 supercell models to obtain the lowest energy sites in initial and final images

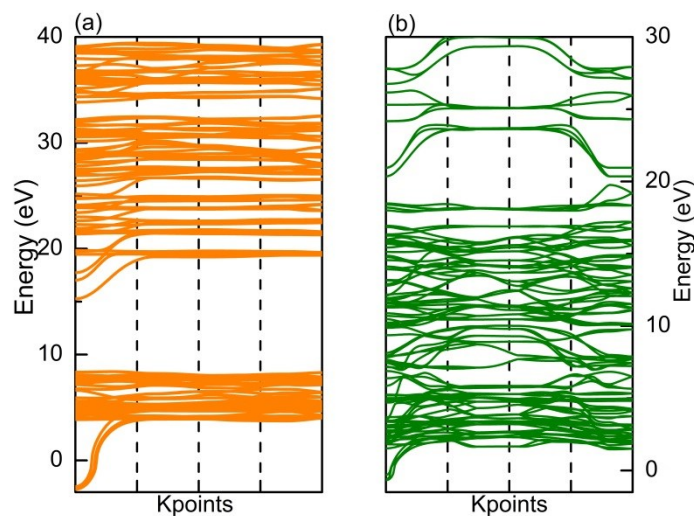

Figure S4 phonon spectra with  $2 \times 2 \times 1$  P21/c (a) and  $2 \times 4 \times 1$  A2/m (b) supercell models calculations

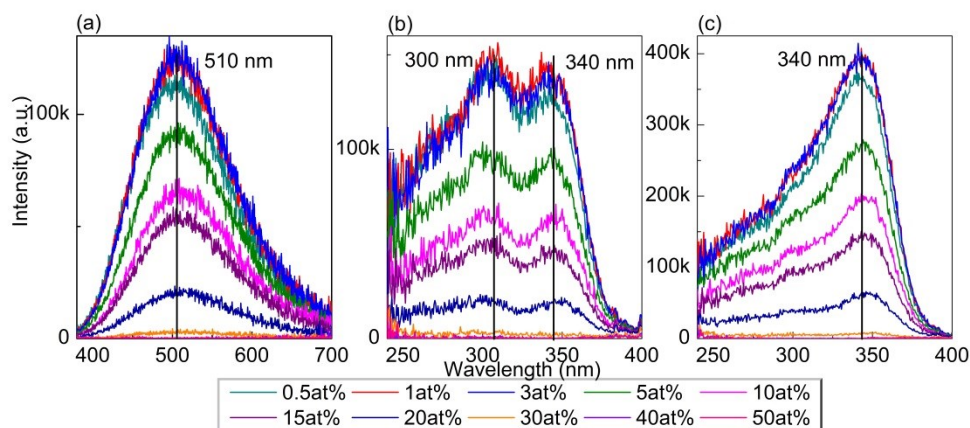

Figure S5 Emission spectral with (a)  $\lambda_{ex}=300$  nm as well as excitation spectrum with detection wavelengths (b)  $\lambda_{em}=450$  nm and (c)  $\lambda_{em}=510$  nm to Bi-doped samples

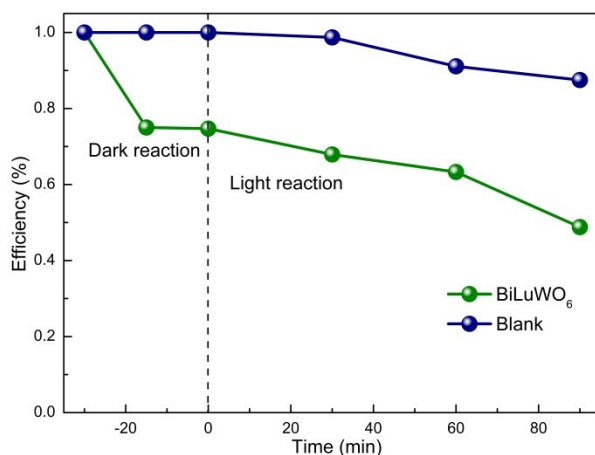

Figure S6 Degradation efficiency of phenol under visible light condition

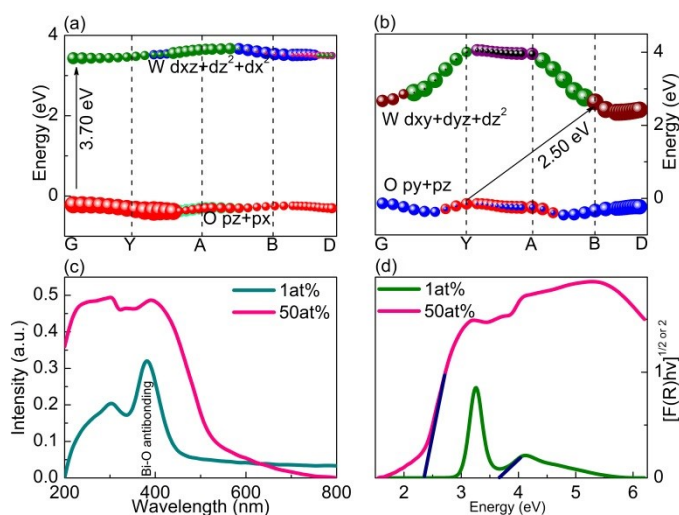

Figure S7 Energy band edge configuration of P21/c (a) and A12/m1 structures (b) Absorption spectrum (c) and Kubelka-Munk function fitting band gap values upon 1at% and 50at% Bi-doped samples (d)

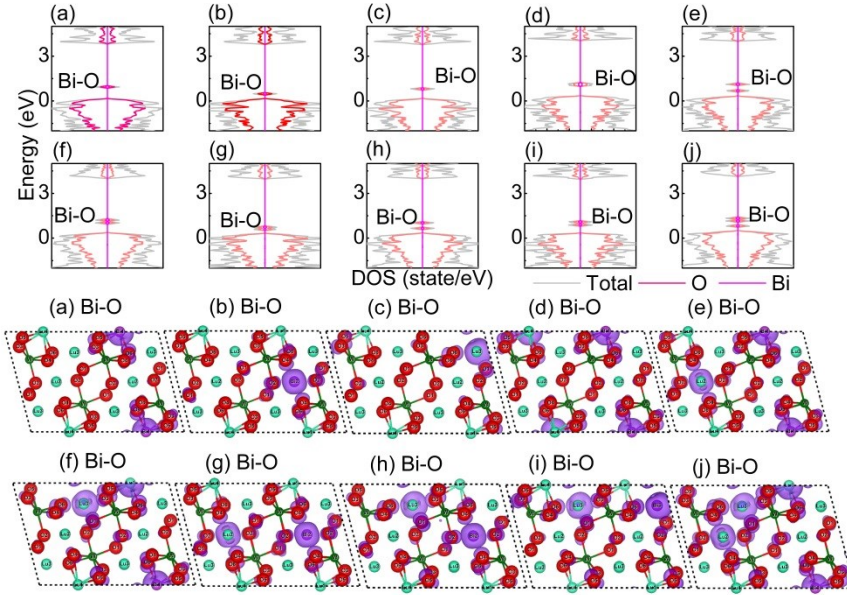

Figure S8 Total, projected DOS of Lu<sub>1</sub>Bi (a), Lu<sub>2</sub>Bi (b), Lu<sub>3</sub>Bi (c), Lu<sub>1</sub>BiLu<sub>1</sub>Bi (d), Lu<sub>1</sub>BiLu<sub>2</sub>Bi (e), Lu<sub>1</sub>BiLu<sub>3</sub>Bi (f), Lu<sub>2</sub>BiLu<sub>2</sub>Bi (g), Lu<sub>2</sub>BiLu<sub>3</sub>Bi (h), Lu<sub>3</sub>BiLu<sub>3</sub>Bi (i), Lu<sub>1</sub>BiLu<sub>2</sub>BiLu<sub>3</sub>Bi (j) models with Bi-O local state charge density in 0.007 e/Bohr<sup>3</sup> isosurface value

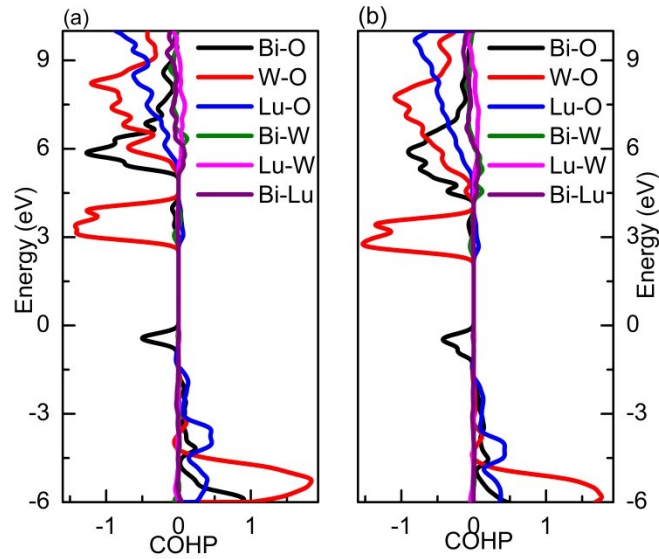

Figure S9 COHP of Lu<sub>2</sub>BiLu<sub>2</sub>Bi (a) and Lu<sub>1</sub>BiLu<sub>2</sub>BiLu<sub>3</sub>Bi (b) models with Fermi levels 0 eV

Table S4. Bader charge of Bi<sup>3+</sup> in three Lu sites for ten doping models

| Models                                                 | Bi <sup>3+</sup> charge numbers |
|--------------------------------------------------------|---------------------------------|
| Lu <sub>1</sub> Bi                                     | 12.9635                         |
| Lu <sub>2</sub> Bi                                     | 12.9093                         |
| Lu <sub>3</sub> Bi                                     | 12.9436                         |
| Lu <sub>1</sub> BiLu <sub>1</sub> Bi                   | 12.9658/12.9658                 |
| Lu <sub>1</sub> BiLu <sub>2</sub> Bi                   | 12.9623/12.9138                 |
| Lu <sub>1</sub> BiLu <sub>3</sub> Bi                   | 12.9610/12.9491                 |
| Lu <sub>2</sub> BiLu <sub>2</sub> Bi                   | 12.9113/12.9113                 |
| Lu <sub>2</sub> BiLu <sub>3</sub> Bi                   | 12.9118/12.9521                 |
| Lu <sub>3</sub> BiLu <sub>3</sub> Bi                   | 12.9468/12.9468                 |
| Lu <sub>1</sub> BiLu <sub>2</sub> BiLu <sub>3</sub> Bi | 12.9611/12.9155/12.9378         |

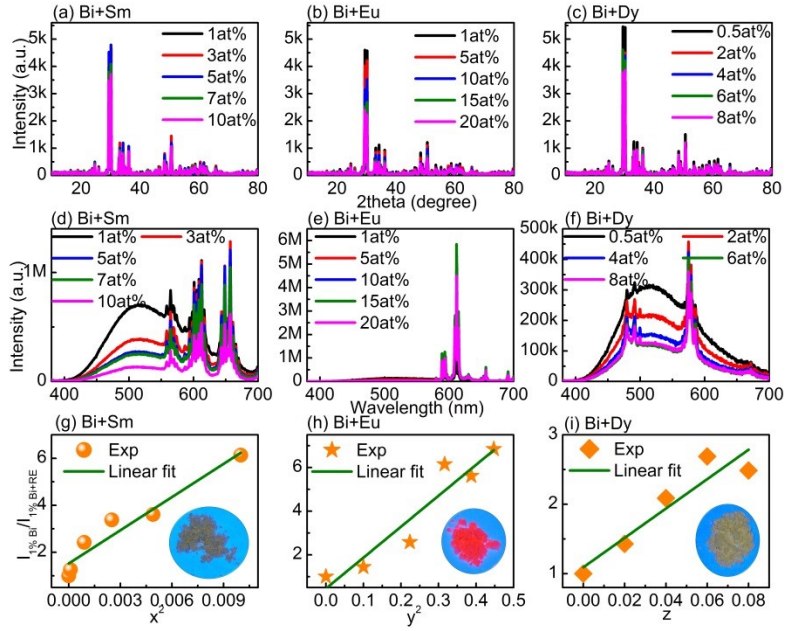

Figure S10 XRD patterns (a), (b), (c), emission spectra of all codoped samples upon 340 nm excitation (d), (e), (f), and dependence relation of  $I(\text{Bi}^{3+})/I(\text{Bi}^{3+}+\text{RE}^{3+})$  on  $x^2/y^2z^1$  with photograph (g), (h), (i)

Table S5 Performance parameters of three LED damps

| Samples | Current (mA) | Ra   | Tc (K) | Purity (%) | Luminous Power (mW) |
|---------|--------------|------|--------|------------|---------------------|
| Bi+Sm   | 50           | 84.2 | 3914   | 53.3       | 1.024               |
|         | 100          | 84.2 | 3963   | 52.1       | 2.067               |
|         | 150          | 84.3 | 4005   | 51.4       | 3.051               |
| Bi+Eu   | 50           | 49.5 | 1270   | 92.6       | 1.181               |
|         | 100          | 59.6 | 1275   | 92.7       | 2.23                |
|         | 150          | 50.4 | 1282   | 92.8       | 3.082               |
| Bi+Dy   | 50           | 58.7 | 5001   | 47.3       | 0.6394              |
|         | 100          | 58.4 | 5023   | 47         | 1.291               |
|         | 150          | 59.6 | 5030   | 46.7       | 1.883               |

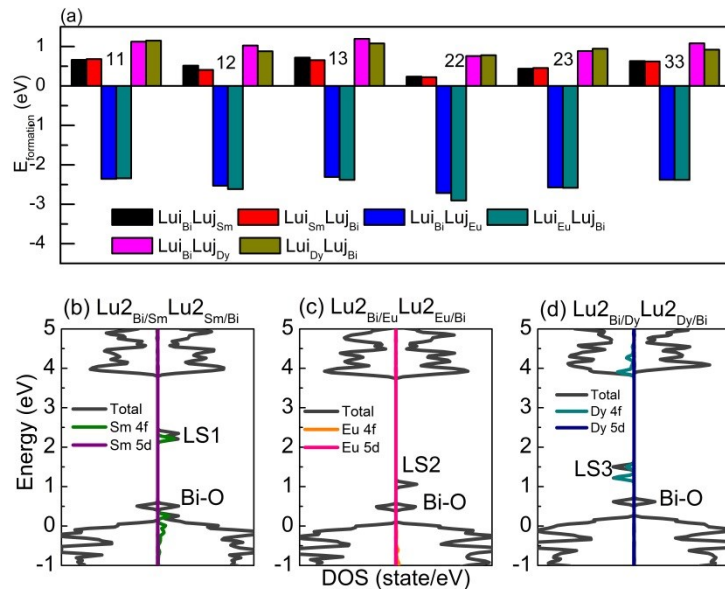

Figure S11 Formation energies of  $\text{Bi}^{3+}+\text{RE}^{3+}$  models (a), density of states for the lowest formation

models (b), (c), and (d)

Table S6 Bader charge numbers of  $\text{Sm}^{3+}/\text{Eu}^{3+}/\text{Dy}^{3+}$  in six typical models

| Models                              | $\text{RE}^{3+}$ charge numbers |
|-------------------------------------|---------------------------------|
| $\text{Lu}_2\text{BiLu}_2\text{Sm}$ | 13.9046                         |
| $\text{Lu}_2\text{SmLu}_2\text{Bi}$ | 13.9044                         |
| $\text{Lu}_2\text{BiLu}_2\text{Eu}$ | 14.8900                         |
| $\text{Lu}_2\text{EuLu}_2\text{Bi}$ | 14.8902                         |
| $\text{Lu}_2\text{BiLu}_2\text{Dy}$ | 17.8026                         |
| $\text{Lu}_2\text{DyLu}_2\text{Bi}$ | 17.8015                         |

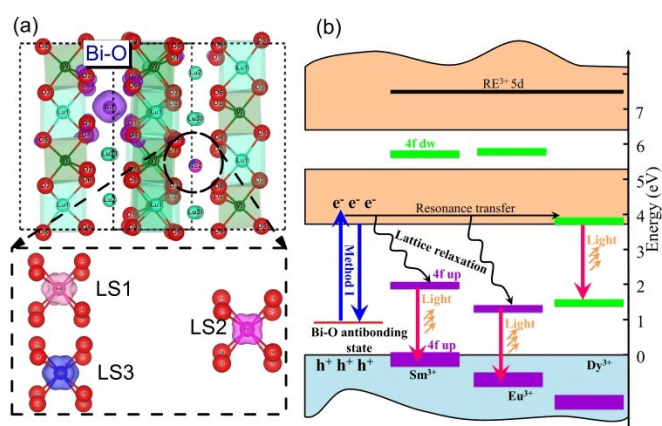

Figure S12 Bi-O antibonding state, LS1, LS2, and LS3 charge density with 0.007  $e/\text{Bohr}^3$  isosurface value (a) and recombination path modification using Bi-O antibonding and  $\text{RE}^{3+}$  4f states (b)
